# Supplementary material for: The Immunoregulatory and Regenerative Potential of Activated Human Stem Cell Secretome Mitigates Acute-on-Chronic Liver Failure in a Rat Model
Source: MDPI journal article supplement (doi:10.3390/ijms25042073), 2024-02-08
Supplement: s1 [file s1]

**Supp Table S2. Antibodies utilized for western blott and immunofluorescence**

|               |                     |            |                   |           |
|---------------|---------------------|------------|-------------------|-----------|
| IL-6          | Santa Cruz Biotech  | SC 57315   | Mouse Monoclonal  | 21 kDa    |
| NGAL          | Santa Cruz Biotech  | SC 515876  | Mouse Monoclonal  | 23 kDa    |
| HMG-1         | Santa Cruz Biotech  | SC56698    | Mouse Monoclonal  | 30 kDa    |
| PCNA          | Santa Cruz Biotech  | SC56       | Mouse Monoclonal  | 35 kDa    |
| HISTONA H4    | Santa Cruz Biotech  | SC377520   | Mouse Monoclonal  | 11 kDa    |
| GAPDH         | Santa Cruz Biotech  | SC32233    | Mouse Monoclonal  | 36 kDa    |
| IL-18         | Novus Biologicals   | NBP3-03699 | Rabbit Policlonal | 22 kDa    |
| KIM-1         | Novus Biologicals   | NBP1-76701 | Rabbit Policlonal | 34 kDa    |
| CAS-3 CLEAVED | Cell Signaling Tech | #9661      | Rabbit Policlonal | 17-19 kDa |
| GAPDH         | Cell Signaling Tech | #2118S     | Rabbit Monoclonal | 37 kDa    |
| HO-1          | Cell Signaling Tech | #43966     | Rabbit Monoclonal | 28 kDa    |
| NFR2          | Cell Signaling Tech | #33649     | Rabbit Monoclonal | 130 kDa   |
| ALPHA-SMA     | ABCAM               | ab5694     | Rabbit Policlonal | 42 kDa    |
