# Supplementary material for: The Immunoregulatory and Regenerative Potential of Activated Human Stem Cell Secretome Mitigates Acute-on-Chronic Liver Failure in a Rat Model
Source: MDPI journal article supplement (doi:10.3390/ijms25042073), 2024-02-08
Supplement: s1 [file s1]

**Supp Table S1. RT-qPCR specific primers and characteristics of amplicons.**

| Gene                        | N° GenBank access | Sense (5'→3')             | Antisense (5'→3')           | Amplicon  |         |
|-----------------------------|-------------------|---------------------------|-----------------------------|-----------|---------|
|                             |                   |                           |                             | size (bp) | Tm (°C) |
| <i>rat CINC-1</i>           | NM_030845.2       | CCATTAAGTGTCAACCACTGTGCTA | CACATTTCTCACCCTAACACAAA     | 100       | 84      |
| <i>rat IL-13</i>            | NM_053828.1       | GCAACATCACACAAGACCAGA     | GTCAGGGAATCCAGGGCTAC        | 233       | 88      |
| <i>rat IL-4</i>             | NM_201270.1       | ATGCACCGAGATGTTTGTACC     | TTTCAGTGTTCTGAGCGTGGA       | 238       | 88      |
| <i>rat IL-5</i>             | NM_021834.1       | TGCTTCTGTGCTTGAACGTTCTAAC | TTCTCTTTTTGTCCGTCAATGTATTTT | 298       | 86      |
| <i>rat IL-6</i>             | NM_012589.2       | CCAGTTGCCTTCTTGGGACT      | TCTGACAGTGCATCATCGCT        | 224       | 86      |
| <i>rat IL-18</i>            | NM_019165.2       | ACCGCAGTAATACGGAGCAT      | CAGTCTGGTCTGGGATTCGT        | 117       | 84      |
| <i>rat MCP-1</i>            | NM_031530.1       | GTGCTGACCCCAATAAGGAA      | TGAGGTGGTTGTGAAAAGA         | 185       | 84      |
| <i>rat TGFβ1</i>            | NM_021578.2       | CACCCGCGTGCTAATGGT        | GGCACTGCTTCCCGAATG          | 111       | 83      |
| <i>rat TNF-α</i>            | NM_012675.3       | AAATGGGCTCCCTCTCATCAGTTC  | TCTGCTTGGTGGTTTGCTACGAC     | 111       | 86      |
| <i>rat HMGB1</i>            | NM_012963.3       | ATTGCTGCCTACAGAGCTAAA     | GTCGTCTTCCTCTTCCTTCTTT      | 96        | 83      |
| <i>rat Kim-1</i>            | NM_173149.2       | TGGCACTGTGACATCCTCAGA     | GCAACGGACATGCCAACATA        | 111       | 84      |
| <i>Rat NGAL</i>             | NM_130741.1       | GGGCTGTCCGATGAACTG        | CATTGGTCGGTGGGAACAGA        | 98        | 84      |
| <i>rat IL-22</i>            | NM_001191988.1    | CTGCCTGCTTCTCGTTGCT       | TAAAGGTGCGGTTGACGATG        | 116       | 86      |
| <i>rat IL-22 receptor</i>   | NM_001003404.2    | GGCAAAGGGATCTCTCTGTTCT    | TAGGAGAGGCAGTGTAGTTCGC      | 143       | 85      |
| <i>rat GADPH</i>            | NM_017008.4       | GACATGCCGCCTGGAGAAAC      | AGCCCAGGATGCCCTTTAGT        | 92        | 87      |
| <i>rat β2 microglobulin</i> | NM_012512.2       | GAAGGAGCCCAAAACCGTCA      | CCGGATCTGGAGTTAACTGGT       | 92        | 84      |
